# Supplementary material for: Carbon dots-decorated hydroxyapatite nanowires–lanthanide metal–organic framework composites as fluorescent sensors for the detection of dopamine
Source: Royal Society of Chemistry journal article supplement (doi:10.1039/d2an00049k), 2022-01-01
Supplement: d2an00049k1.pdf [file d2an00049k1.pdf]

Supplementary material

**Carbon Dots-Decorated Hydroxyapatite Nanowires-  
Lanthanide Metal-Organic Framework Composites  
as Fluorescent Sensors for Detection of Dopamine**

*Mengyao Sun,<sup>†</sup> Lei Zhang,<sup>\*†</sup> Sen Xu,<sup>†</sup> Bohao Yu,<sup>†</sup> Yajie Wang,<sup>‡</sup> Lingyi Zhang<sup>†</sup> and Weibing Zhang<sup>\*†</sup>*

<sup>†</sup> Shanghai Key Laboratory of Functional Materials Chemistry, School of Chemistry & Molecular Engineering, East China University of Science and Technology, Shanghai 200237, China.

<sup>‡</sup> Department of Pharmacy, Anhui Medical College, Hefei, 230601, China

Corresponding authors: Lei Zhang, Weibing Zhang

\*E-mail: leizhang595@ecust.edu.cn. Tel: +86-21-64252942. Fax: +86-21-64252947.

\*E-mail: weibingzhang@ecust.edu.cn. Tel: +86-21-64252145. Fax: +86-021-64233161.

## Material characterization

**Table S1.** The comparison of different detection method for DA detection.

**Figure S1.** TEM of HAPNWs (a) and zoom of TEM of HAPNWs-CDs-Tb/MOF (b).

**Figure S2.** Energy Dispersive Spectrometer (EDS) spectrum of the HAPNWs (a) and HAPNWs-CDs-Tb/MOF (b).

**Figure S3.** The emission spectra of CDs (a), Tb-MOF (b) and HAPNWs-CDs-Tb/MOF (c).

**Figure S4.** Stern-Volmer plot for CDs quenching on the probe by DA.

**Figure S5.** Emission spectra of CDs (a), Tb-MOF (b) and HAPNWs-CDs-Tb/MOF (c) solution with different excitation wavelengths.

**Figure S6.** Emission spectra of HAPNWs-CDs-Tb/MOF solution with (red, right) and without (black, left) DA. (Inset: The diagram of fluorescence color change).

**Figure S7.** Effects of pH values on fluorescence intensity of HAPNWs-CDs-Tb/MOF with (red) and without (black) DA (a), effects of interaction time on fluorescence intensity of HAPNWs-CDs-Tb/MOF with DA (b).

**Figure S8.** The short-term stability of HAPNWs-CDs-Tb/MOF suspension solution with (red) and without (black) DA (a), the long-term stability of HAPNWs-CDs-Tb/MOF suspension solution (b).

**Figure S9.** The emission spectra of  $Tb^{3+}$ ,  $Tb^{3+}$  with BTC,  $Tb^{3+}$  with DA and  $Tb^{3+}$  with BTC and DA.

**Table S1** The comparison of different detection method for DA detection

| Detection Method       | Linear Range ( $\mu\text{M}$ ) | Detection Limit ( $\mu\text{M}$ ) | $R^2$   | Refs.     |
|------------------------|--------------------------------|-----------------------------------|---------|-----------|
| Electrochemical method | 100-1000                       | 0.24                              | 0.9842  | [1]       |
| Electrochemical method | 2-800                          | 0.67                              | ---     | [2]       |
| Colorimetric method    | 0.01-3.6                       | 0.255                             | 0.9998  | [3]       |
| Electrochemical method | 5-50                           | 1.32                              | 0.996   | [4]       |
| Colorimetric method    | 1-100                          | 0.66                              | 0.991   | [5]       |
| Fluorescence method    | 0.1-200                        | 0.01664                           | 0.99    | [6]       |
| Fluorescence method    | 10-80                          | 0.12                              | 0.93575 | [7]       |
| Fluorescence method    | 0.1-100                        | 0.032                             | 0.999   | [8]       |
| This work              | 0.04-20                        | 0.01226                           | 0.9979  | This work |

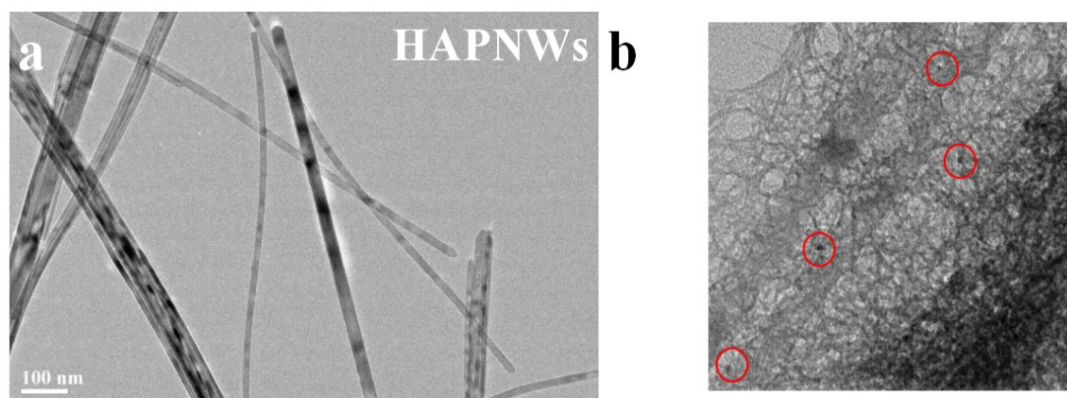

**Figure S1.** TEM of HAPNWs (a) and zoom of TEM of HAPNWs-CDs-Tb/MOF (b).

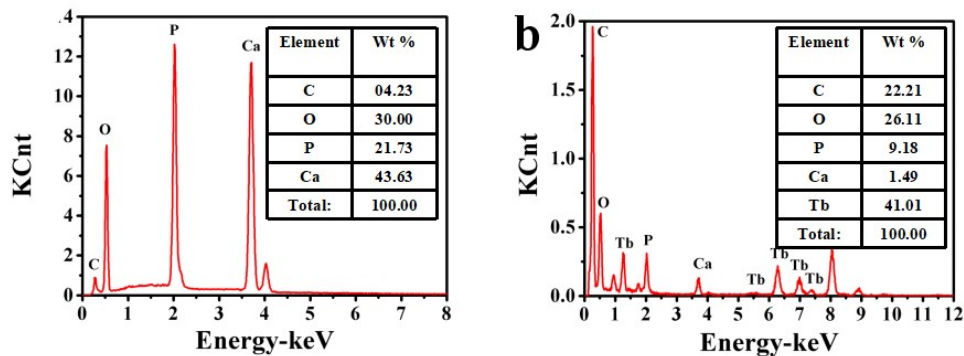

**Figure S2.** Energy Dispersive Spectrometer (EDS) spectrum of the HAPNWs (a) and HAPNWs-CDs-Tb/MOF (b).

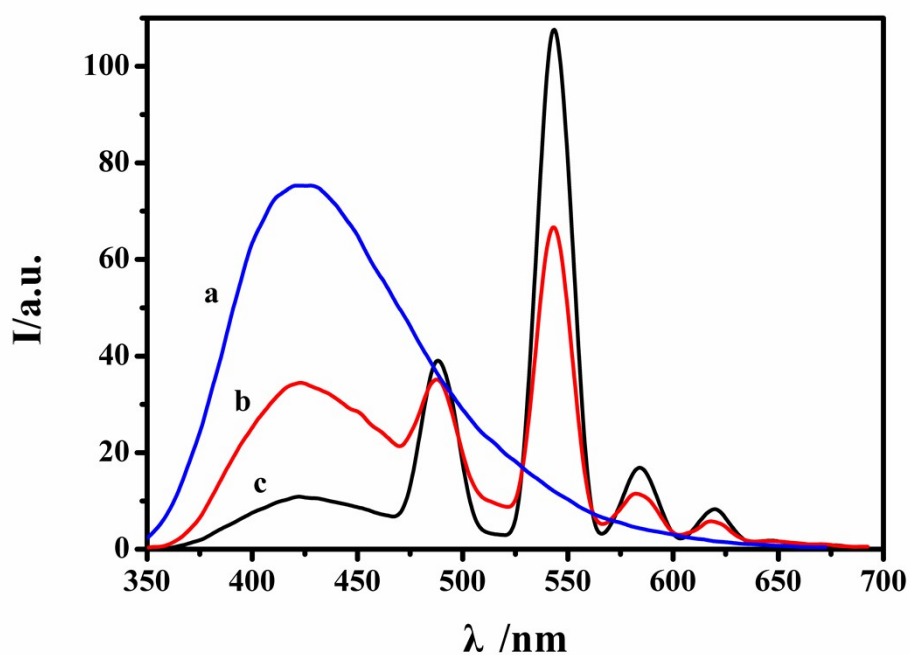

**Figure S3.** The emission spectra of CDs (a), Tb-MOF (b) and HAPNWs-CDs-Tb/MOF (c).

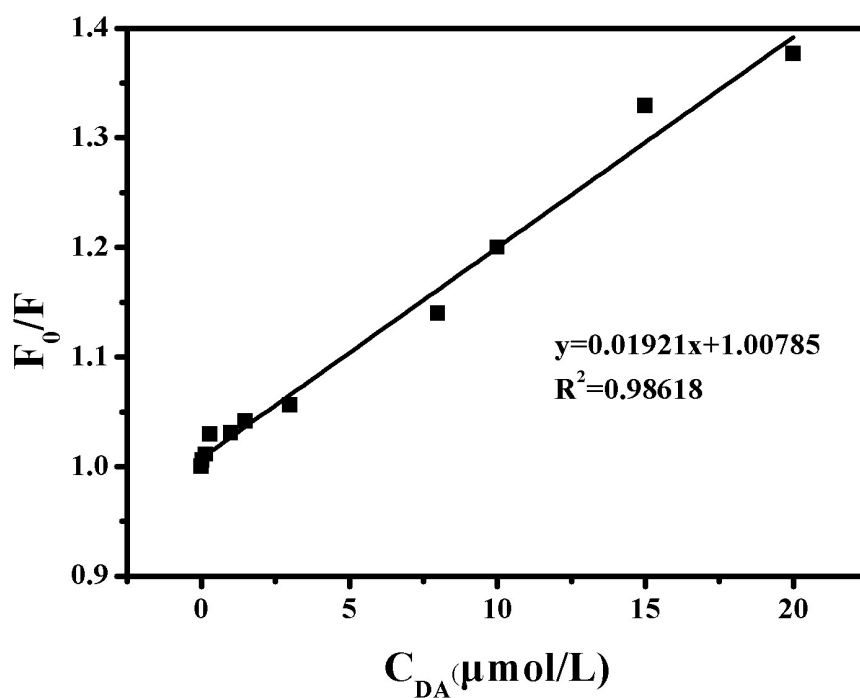

**Figure S4.** Stern-Volmer plot for CDs quenching on the probe by DA.

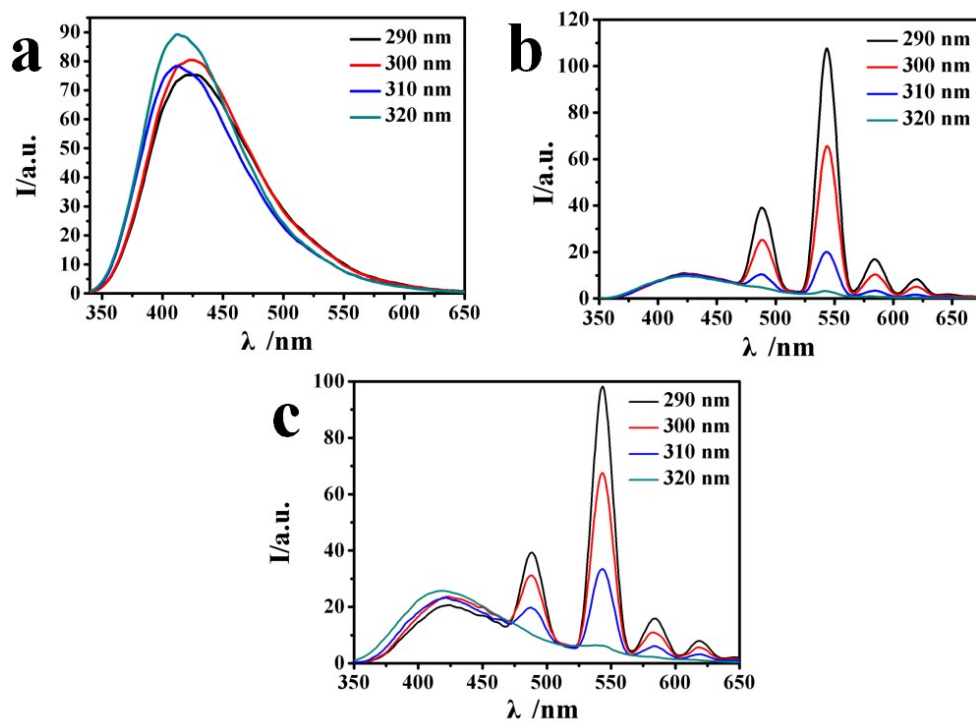

**Figure S5.** Emission spectra of CDs (a), Tb-MOF (b) and HAPNWs-CDs-Tb/MOF (c) solution with different excitation wavelengths.

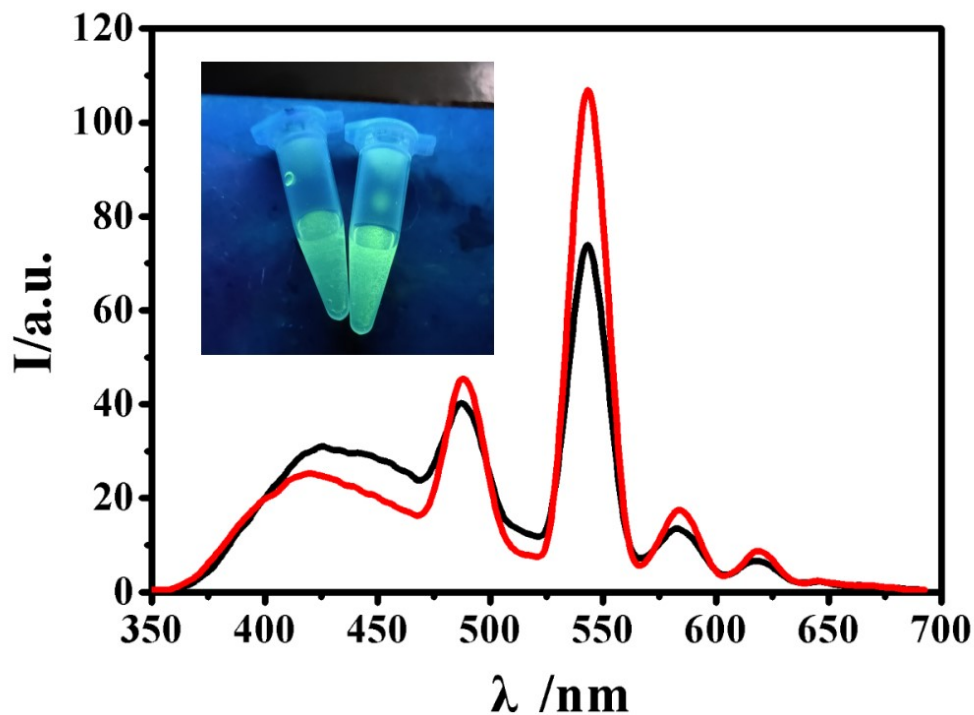

**Figure S6.** Emission spectra of HAPNWs-CDs-Tb/MOF solution with (red, right) and without (black, left) DA. (Inset: The diagram of fluorescence color change).

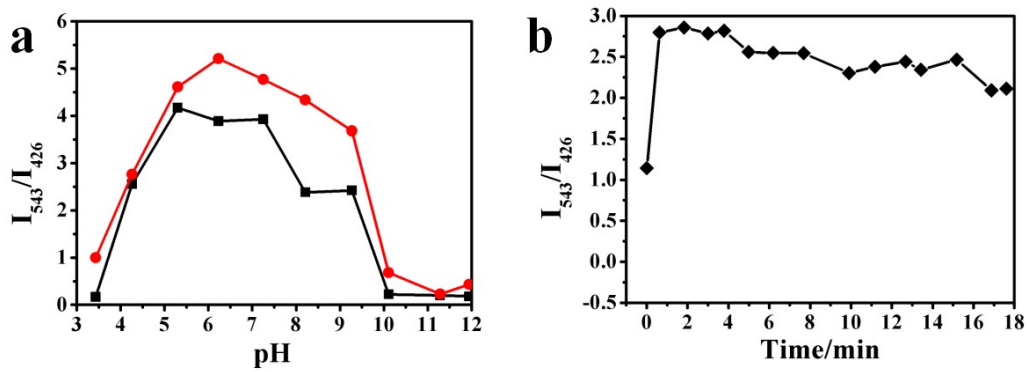

**Figure S7.** Effects of pH values on fluorescence intensity of HAPNWs-CDs-Tb/MOF with (red) and without (black) DA (a), effects of interaction time on fluorescence intensity of HAPNWs-CDs-Tb/MOF with DA (b).

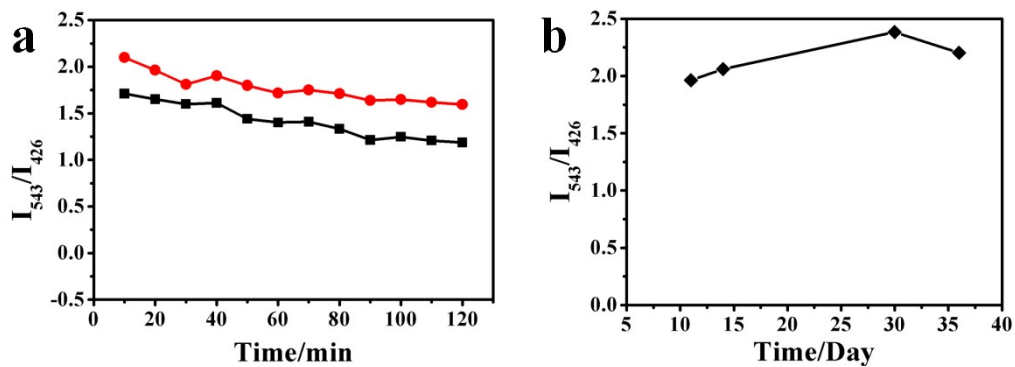

**Figure S8.** The short-term stability of HAPNWs-CDs-Tb/MOF suspension solution with (red) and without (black) DA (a), the long-term stability of HAPNWs-CDs-Tb/MOF suspension solution (b).

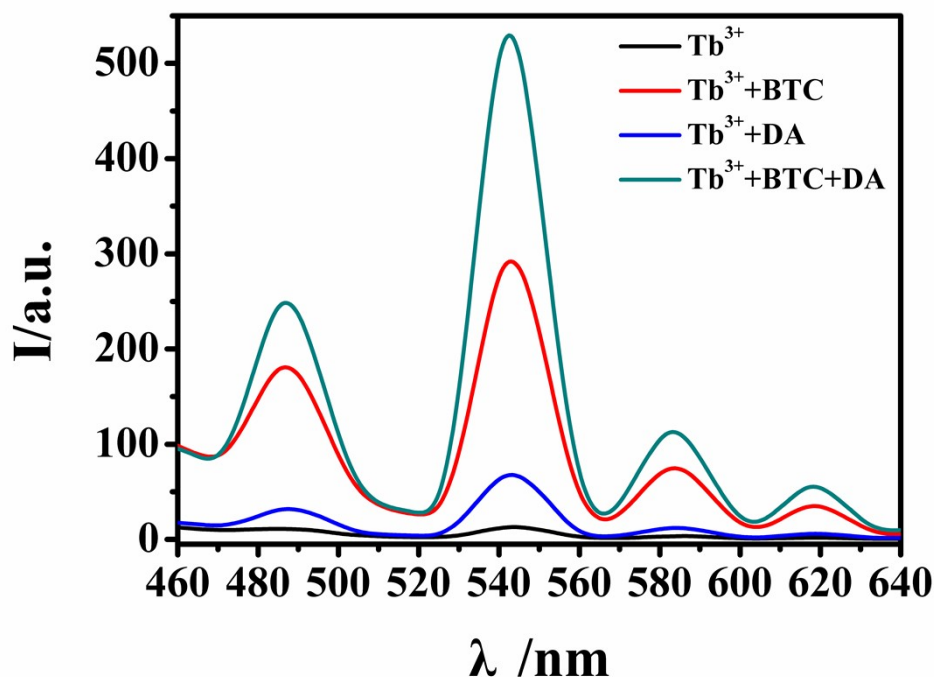

**Figure S9.** The emission spectra of  $Tb^{3+}$ ,  $Tb^{3+}$  with BTC,  $Tb^{3+}$  with DA and  $Tb^{3+}$  with BTC and DA.

#### References

- [1] U. Amara, M. T. Mehran, B. Sarfaraz, K. Mahmood, A. Hayat, M. Nasir, S. Riaz and M. H. Nawaz, *Microchim Acta*, 2021, **188**, 230.
- [2] X. Zhang, D. Q. Li, Y. G. Sun, C. Y. Dong, H. J. Zhu, X. Li, Q. M. Cao, J. W. Shen, F. L. Yan, Y. J. Wei, Y. J. Lu, J. Yu, J. W. Zhu, Z. Wan and Y. D. Xu, *Mater Lett*, 2021, **293**, 129739.
- [3] U. Nishan, U. Sabba, A. Rahim, M. Asad, M. Shah, A. Iqbal, J. Iqbal and N. Muhammad, *Mater Chem Phys*, 2021, **262**, 124289.
- [4] R. R. Mathiarasu, A. Manikandan, J. N. Baby, K. Panneerselvam, R. Subashchandrabose, M. George, Y. Slimani, M. A. Almessiere and A. Baykal, *Physica B*, 2021, **615**, 413068.
- [5] X. Lai, Y. Han, J. Zhang, J. Y. Zhang, W. F. Lin, Z. W. Liu and L. G. Wang, *Molecules*, 2021, **26**, 2738.
- [6] S. Q. Xie, X. J. Li, L. M. Wang, F. W. Zhu, X. Y. Zhao, T. Q. Yuan, Q. Liu and X. Q. Chen, *Microchem J*, 2021, **160**, 105718.
- [7] M. A. Yu, Y. Lu and Z. J. Tan, *Talanta*, 2017, **168**, 16-22.
- [8] W. J. He, R. J. Gui, H. Jin, B. Q. Wang, X. N. Bu and Y. X. Fu, *Talanta*, 2018, **178**, 109-115.
